# Supplementary material for: The Adhesion and Spoilage of Shewanella putrefaciens in Tilapia
Source: MDPI journal article supplement (doi:10.3390/foods11131913), 2022-06-27
Supplement: s1 [file s1]

# Supplementary Materials

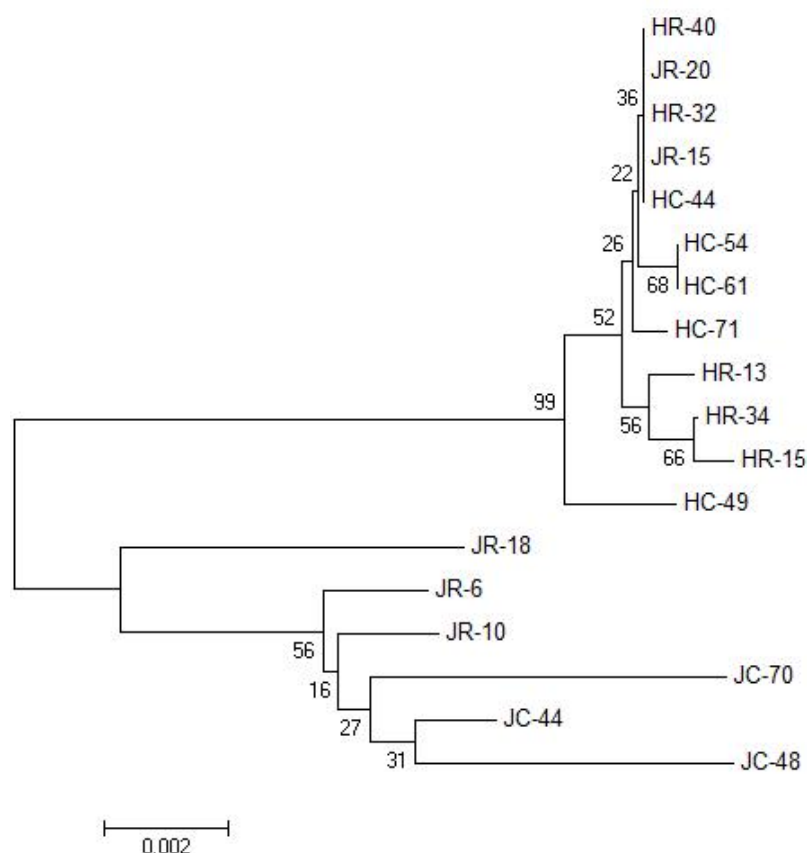

**Figure S1.** Phylogenetic tree analysis plot of 18 bacterial strains isolated from tilapia body and its living environment was carried out.

**Table S1.** Determination of volatile flavor compounds in fish flesh after storage for 0 and 6 days by GC-MS.

| No. | Compounds                  | Concentration (mg/L) |           |                |           |                |           |                |                |
|-----|----------------------------|----------------------|-----------|----------------|-----------|----------------|-----------|----------------|----------------|
|     |                            | Control_0            | HR_15_0   | JR_18_0        | HC_71_0   | Control_6      | HR_15_6   | JR_18_6        | HC_71_6        |
| 1   | Benzyl alcohol             | 0                    | 0         | 0              | 0         | 0.0060002<br>7 | 0         | 0              | 0              |
| 2   | Phenylethyl alcohol        | 0                    | 0         | 0.0087800<br>2 | 0         | 0.0570408      | 0.0189116 | 0.0337343      | 0.0409916      |
| 3   | 1-Propanol,3-(methylthio)- | 0                    | 0         | 0              | 0         | 0.0079823<br>4 | 0         | 0.0040864<br>6 | 0.0059424      |
| 4   | 1-Butanol                  | 0                    | 0         | 0.026526       | 0         | 0              | 0         | 0              | 0              |
| 5   | Isoamyl alcohol            | 0                    | 0         | 0              | 0         | 0.153931       | 0         | 0              | 0              |
| 6   | n-Hexyl alcohol            | 0                    | 0         | 0              | 0         | 0.0199328      | 0         | 0.0193308      | 0              |
| 7   | 2-Ethyl-1-hexanol          | 0.0157037            | 0.0242277 | 0.020183       | 0.0139456 | 0.0240488      | 0.0158369 | 0.034609       | 0.0103195      |
| 8   | 1-Heptanol, 6-Methyl-      | 0                    | 0         | 0              | 0         | 0              | 0         | 0              | 0.0061831<br>3 |
| 9   | 1-Octanol                  | 0.0088972<br>2       | 0         | 0.0122797      | 0         | 0              | 0         | 0.0086338<br>2 | 0              |

|    |                                               |                |                |                |                |           |           |           |                |
|----|-----------------------------------------------|----------------|----------------|----------------|----------------|-----------|-----------|-----------|----------------|
| 10 | Cyclooctanol                                  | 0.0439114      | 0              | 0.0248942      | 0              | 0         | 0         | 0         | 0              |
| 11 | 1-Octen-3-ol                                  | 0.179814       | 0.0707772      | 0.200518       | 0.271222       | 0.314882  | 0.134928  | 0.131511  | 0.0798976      |
| 12 | 2-Octen-1-ol                                  | 0              | 0              | 0              | 0              | 0.0792827 | 0.0263469 | 0         | 0              |
| 13 | cis-2-Nonen-1-ol                              | 0              | 0              | 0              | 0              | 0.0716065 | 0         | 0         | 0              |
| 14 | Ethyl-PEG4-alcohol                            | 0              | 0.003824       | 0              | 0.0072021<br>8 | 0         | 0.0125542 | 0.0144037 | 0.0072319<br>5 |
| 15 | Dichloromethane                               | 0              | 0              | 0              | 0              | 0         | 0         | 0         | 0.0019279<br>1 |
| 16 | Cyclodecane                                   | 0              | 0              | 0              | 0              | 0         | 0         | 0         | 0.0133213      |
| 17 | naphthalene                                   | 0.0074691<br>6 | 0.0056892<br>9 | 0              | 0.0093948      | 0.0177583 | 0.0119786 | 0.0102225 | 0.0117814      |
| 18 | 1,3-Cyclooctadiene                            | 0.0665207      | 0.0222672      | 0.0482567      | 0.0864693      | 0.166543  | 0.0521605 | 0.035915  | 0.0161463      |
| 19 | 1-Decene                                      | 0              | 0              | 0              | 0.0120163      | 0         | 0         | 0         | 0              |
| 20 | 2,5,5-Trimethyl-2-hexene                      | 0              | 0              | 0.10486        | 0.145482       | 0         | 0.119025  | 0.0835227 | 0.0911434      |
| 21 | Benzaldehyde                                  | 0.0059466      | 0.0054343<br>9 | 0.0085063<br>8 | 0.0136683      | 0.0574382 | 0.0331552 | 0.0412288 | 0.0265823      |
| 22 | Phenylacetaldehyde                            | 0              | 0              | 0              | 0              | 0         | 0         | 0.0127273 | 0              |
| 23 | Hexanal                                       | 0.0019701      | 0              | 0              | 0              | 0         | 0         | 0         | 0              |
| 24 | n-capryl(ic) aldehyde                         | 0              | 0              | 0.0207473      | 0              | 0         | 0         | 0         | 0              |
| 25 | Nonanal                                       | 0.0565697      | 0.0585565      | 0.0769311      | 0.0493641      | 0.0547983 | 0.0460169 | 0.0620162 | 0.0462601      |
| 26 | Decanal                                       | 0.0306064      | 0.0326806      | 0.0192433      | 0.0145414      | 0         | 0         | 0         | 0              |
| 27 | 7-Methoxy-1,3-benzodioxole-5-carboxaldehyde   | 0              | 0              | 0              | 0              | 0.0163072 | 0         | 0         | 0.0229477      |
| 28 | octadecanal                                   | 0              | 0              | 0              | 0              | 0         | 0.0151497 | 0         | 0              |
| 29 | dimethylsilanediol                            | 0              | 0              | 0              | 0.0197672      | 0         | 0.011725  | 0         | 0.0126715      |
| 30 | Carbamic acid                                 | 0.106571       | 0              | 0.0916732      | 0              | 0         | 0.0368159 | 0         | 0.0260926      |
| 31 | Ethyl<br>2-hydroxy-2-(4-hydroxyphenyl)acetate | 0              | 0              | 0              | 0              | 0         | 0.01409   | 0         | 0              |
| 32 | n-Butyl butanoate                             | 0              | 0              | 0              | 0              | 0         | 0         | 0.0121213 | 0.0063457<br>3 |
| 33 | Hexyl chlorocarbonate                         | 0              | 0              | 0              | 0              | 0         | 0         | 0.019009  | 0              |
| 34 | Formic acid, octylester                       | 0              | 0              | 0.0130695      | 0              | 0         | 0         | 0         | 0              |
| 35 | phenyl acetate                                | 0.0038193<br>6 | 0              | 0              | 0              | 0         | 0         | 0         | 0              |
| 36 | 3-Octanone                                    | 0              | 0              | 0.011306       | 0              | 0         | 0         | 0         | 0.0068053<br>9 |
| 37 | 2-Methyl-3-Octanol                            | 0              | 0              | 0              | 0.0145139      | 0         | 0         | 0         | 0              |
| 38 | 2,3-Octanedione                               | 0              | 0              | 0              | 0              | 0.0136639 | 0         | 0         | 0              |

|    |                                     |                |                |                |                |           |                |                |                |
|----|-------------------------------------|----------------|----------------|----------------|----------------|-----------|----------------|----------------|----------------|
| 39 | 2,5-Octanedione                     | 0              | 0              | 0              | 0              | 0         | 0              | 0.0138113      | 0              |
| 40 | Phenol                              | 0              | 0              | 0              | 0              | 0.0280136 | 0.0064365<br>2 | 0.0117643      | 0.0054067<br>3 |
| 41 | 2,4-Di-t-butylphenol                | 0.0846115      | 0.0637134      | 0.11579        | 0.0119234      | 0.159647  | 0.0823175      | 0.109517       | 0.0975851      |
| 42 | Butylated hydroxytoluene            | 0.0123474      | 0.0095405<br>8 | 0.0227913      | 0.115976       | 0.0158433 | 0.0191552      | 0.0099613<br>8 | 0.0085268      |
| 43 | biphenyl                            | 0.0027217<br>3 | 0              | 0.0071482<br>1 | 0.0052373<br>1 | 0         | 0              | 0.0046587<br>7 | 0              |
| 44 | Benzene,1,3-bis(1,1-dimethylethyl)- | 0.430832       | 0.171806       | 0.628301       | 0.503079       | 0.27652   | 0.305435       | 0.210267       | 0.176572       |
